# Supplementary material for: The Home-Cage Automated Skilled Reaching Apparatus (HASRA): Individualized Training of Group-Housed Mice in a Single Pellet Reaching Task
Source: eNeuro. 2020 Oct 12;7(5):ENEURO.0242-20.2020. doi: 10.1523/ENEURO.0242-20.2020 (PMC7581188; doi:10.1523/ENEURO.0242-20.2020)
Supplement: Extended Data 1 — Archive of assembly instructions, Python/Arduino code, 3D printing STL files, and wiring diagrams. See “homecage assembly manual.pdf” and “README.md” contained in archive for more details. Download Extended Data 1, ZIP file. [file enu-eN-MNT-0242-20-s03.zip]

Archive with 56 entries (44 files):
- Extended Data 1/
- __MACOSX/._Extended Data 1
- Extended Data 1/temp/
- __MACOSX/Extended Data 1/._temp
- Extended Data 1/config/
- __MACOSX/Extended Data 1/._config
- Extended Data 1/resources/
- __MACOSX/Extended Data 1/._resources
- Extended Data 1/AnimalProfiles/
- __MACOSX/Extended Data 1/._AnimalProfiles
- Extended Data 1/dependencies/
- __MACOSX/Extended Data 1/._dependencies
- Extended Data 1/Homecage assembly manual.pdf
- __MACOSX/Extended Data 1/._Homecage assembly manual.pdf
- Extended Data 1/README.md
- Extended Data 1/CAD/
- __MACOSX/Extended Data 1/._CAD
- Extended Data 1/src/
- __MACOSX/Extended Data 1/._src
- Extended Data 1/temp/pelletClassifierFatMouse.jpg
- __MACOSX/Extended Data 1/temp/._pelletClassifierFatMouse.jpg
- Extended Data 1/config/trialLimitConfig.txt
- Extended Data 1/resources/Images/
- __MACOSX/Extended Data 1/resources/._Images
- Extended Data 1/AnimalProfiles/.keep
- __MACOSX/Extended Data 1/AnimalProfiles/._.keep
- Extended Data 1/dependencies/requirements.txt
- Extended Data 1/CAD/Moving_Stage_Top.STL
- Extended Data 1/CAD/Beam_Breaker_Mount.STL
- Extended Data 1/CAD/Standard.STL
- Extended Data 1/CAD/Moving_Stage_Bottom.STL
- Extended Data 1/CAD/Arm.STL
- Extended Data 1/CAD/Hopper.STL
- Extended Data 1/CAD/Light_Holder.STL
- Extended Data 1/CAD/Tubeholder_3cm.STL
- Extended Data 1/CAD/Motor_coupler.STL
- Extended Data 1/src/arduino/
- __MACOSX/Extended Data 1/src/._arduino
- Extended Data 1/src/client/
- __MACOSX/Extended Data 1/src/._client
- Extended Data 1/src/arduino/homecage_server/
- __MACOSX/Extended Data 1/src/arduino/._homecage_server
- Extended Data 1/src/client/detector.py
- Extended Data 1/src/client/test_monitor.py
- Extended Data 1/src/client/config.txt
- Extended Data 1/src/client/detection_frame.jpg
- __MACOSX/Extended Data 1/src/client/._detection_frame.jpg
- Extended Data 1/src/client/systemCheck.py
- Extended Data 1/src/client/arduinoClient.py
- Extended Data 1/src/client/data_utils.py
- Extended Data 1/src/client/googleDriveManager.py
- Extended Data 1/src/client/genProfiles.py
- Extended Data 1/src/client/main.py
- Extended Data 1/src/client/driver_for_a_better_camera.py
- Extended Data 1/src/client/gui.py
- Extended Data 1/src/arduino/homecage_server/homecage_server.ino
