# Supplementary material for: The Home-Cage Automated Skilled Reaching Apparatus (HASRA): Individualized Training of Group-Housed Mice in a Single Pellet Reaching Task
Source: eNeuro. 2020 Oct 12;7(5):ENEURO.0242-20.2020. doi: 10.1523/ENEURO.0242-20.2020 (PMC7581188; doi:10.1523/ENEURO.0242-20.2020)
Supplement: Extended Data 1 — Archive of assembly instructions, Python/Arduino code, 3D printing STL files, and wiring diagrams. See “homecage assembly manual.pdf” and “README.md” contained in archive for more details. Download Extended Data 1, ZIP file. [file enu-eN-MNT-0242-20-s03.zip › Extended Data 1/dependencies/requirements.txt]

# This file may be used to create an environment using:
# $ conda create --name <env> --file <this file>
# platform: win-64
_tflow_select=2.3.0=mkl
absl-py=0.9.0=py36_0
astor=0.8.0=py36_0
blas=1.0=mkl
ca-certificates=2020.1.1=0
certifi=2019.11.28=py36_0
console_shortcut=0.1.1=3
cycler=0.10.0=py36h009560c_0
freetype=2.9.1=ha9979f8_1
gast=0.3.3=py_0
grpcio=1.16.1=py36h351948d_1
h5py=2.10.0=py36h5e291fa_0
hdf5=1.10.4=h7ebc959_0
icc_rt=2019.0.0=h0cc432a_1
icu=58.2=ha66f8fd_1
intel-openmp=2019.4=245
jpeg=9b=hb83a4c4_2
keras=2.2.4=0
keras-applications=1.0.8=py_0
keras-base=2.2.4=py36_0
keras-preprocessing=1.1.0=py_1
kiwisolver=1.1.0=py36ha925a31_0
libblas=3.8.0=7_h8933c1f_netlib
libcblas=3.8.0=7_h8933c1f_netlib
liblapack=3.8.0=7_h8933c1f_netlib
libmklml=2019.0.5=0
libpng=1.6.37=h2a8f88b_0
libprotobuf=3.11.4=h7bd577a_0
m2w64-gcc-libgfortran=5.3.0=6
m2w64-gcc-libs=5.3.0=7
m2w64-gcc-libs-core=5.3.0=7
m2w64-gmp=6.1.0=2
m2w64-libwinpthread-git=5.0.0.4634.697f757=2
markdown=3.1.1=py36_0
matplotlib=3.1.3=py36_0
matplotlib-base=3.1.3=py36h64f37c6_0
mkl=2020.0=166
mkl-service=2.3.0=py36hb782905_0
msys2-conda-epoch=20160418=1
numpy=1.18.1=py36hc71023c_0
opencv-python=4.1.2+contrib=pypi_0
openssl=1.1.1d=he774522_4
pip=19.3.1=pypi_0
protobuf=3.11.4=py36h33f27b4_0
psutil=5.6.7=py36he774522_0
pyparsing=2.4.6=py_0
pyqt=5.9.2=py36h6538335_2
pyreadline=2.1=py36_1
pyserial=3.4=py36_0
pysnooper=0.2.8=py_0
python=3.6.10=h9f7ef89_0
python-dateutil=2.8.1=py_0
pytz=2019.3=py_0
pyyaml=5.3=py36he774522_0
pyzmq=18.1.1=pypi_0
qt=5.9.7=vc14h73c81de_0
scipy=1.4.1=py36h9439919_0
setuptools=45.2.0=py36_0
sip=4.19.8=py36h6538335_0
six=1.14.0=py36_0
sqlite=3.31.1=he774522_0
tbb=2020.0=h74a9793_0
tensorboard=1.10.0=py36he025d50_0
tensorflow=1.10.0=mkl_py36hb361250_0
tensorflow-base=1.10.0=mkl_py36h81393da_0
termcolor=1.1.0=py36_1
tk=8.6.8=hfa6e2cd_0
tornado=6.0.3=py36he774522_3
tqdm=4.36.1=py_0
vc=14.1=h0510ff6_4
vs2015_runtime=14.16.27012=hf0eaf9b_1
werkzeug=1.0.0=py_0
wheel=0.34.2=py36_0
wincertstore=0.2=py36h7fe50ca_0
yaml=0.1.7=hc54c509_2
zlib=1.2.11=h62dcd97_3
