# Supplementary material for: The Home-Cage Automated Skilled Reaching Apparatus (HASRA): Individualized Training of Group-Housed Mice in a Single Pellet Reaching Task
Source: eNeuro. 2020 Oct 12;7(5):ENEURO.0242-20.2020. doi: 10.1523/ENEURO.0242-20.2020 (PMC7581188; doi:10.1523/ENEURO.0242-20.2020)
Supplement: Extended Data 1 — Archive of assembly instructions, Python/Arduino code, 3D printing STL files, and wiring diagrams. See “homecage assembly manual.pdf” and “README.md” contained in archive for more details. Download Extended Data 1, ZIP file. [file enu-eN-MNT-0242-20-s03.zip › Extended Data 1/src/client/config.txt]

COM27
USB VID:PID=1A86:7523 SER=5 LOCATION=1-2
1-2
******************* 
COM16
USB VID:PID=1A86:7523 SER=5 LOCATION=1-4
1-4
******************* 
COM1
USB VID:PID=0000:0000
None
******************* 
COM18
USB VID:PID=0403:6001 SER=A6024DMNA
None
******************* 
COM23
USB VID:PID=0403:6001 SER=A9084Y1CA
None
******************* 
COM28
USB VID:PID=1A86:7523 SER=7 LOCATION=1-6.1.2
1-6.1.2
******************* 
COM19
USB VID:PID=0403:6001 SER=AH05K4CXA
None
******************* 
COM3
USB VID:PID=0000:0000
None
******************* 
