# Supplementary material for: The Home-Cage Automated Skilled Reaching Apparatus (HASRA): Individualized Training of Group-Housed Mice in a Single Pellet Reaching Task
Source: eNeuro. 2020 Oct 12;7(5):ENEURO.0242-20.2020. doi: 10.1523/ENEURO.0242-20.2020 (PMC7581188; doi:10.1523/ENEURO.0242-20.2020)
Supplement: Extended Data 1 — Archive of assembly instructions, Python/Arduino code, 3D printing STL files, and wiring diagrams. See “homecage assembly manual.pdf” and “README.md” contained in archive for more details. Download Extended Data 1, ZIP file. [file enu-eN-MNT-0242-20-s03.zip › Extended Data 1/src/client/data_utils.py]

import cv2
import os
from copy import deepcopy
from tqdm import tqdm
import numpy as np

def generate_dataset(input_folder, output_folder):
    assert os.path.isdir(input_folder) and os.path.isdir(output_folder)
    output_folder_1 = os.path.join(output_folder, "1")
    if not os.path.exists(output_folder_1):
        os.mkdir(output_folder_1)

    output_folder_0 = os.path.join(output_folder, "0")
    if not os.path.exists(output_folder_0):
        os.mkdir(output_folder_0)

    # video_files = [os.path.join(input_folder, item) for item in os.listdir(input_folder) if item.endswith('.avi')]
    video_files = [os.path.join(input_folder, item) for item in os.listdir(input_folder) if item == '2020-01-18_(07-04-58)_002FBE71E101_85136_12950.avi']
    for video_file in tqdm(video_files):
        video_stream = cv2.VideoCapture(video_file)
        grab, frame = video_stream.read()
        while frame is not None:
            showframe = deepcopy(frame)
            showframe = cv2.putText(showframe,"1: Display, 2: Do Nothing, 3: Discard", (40, 40), cv2.FONT_HERSHEY_SIMPLEX, 0.5, (255, 255, 255), lineType=cv2.LINE_AA)
            cv2.imshow('frame', showframe)
            img_path = os.path.basename(video_file).replace(".avi", "") + "%d.jpg" % video_stream.get(cv2.CAP_PROP_POS_FRAMES)
            frame = cv2.resize(frame, (224, 224))
            if cv2.waitKey(0) == 49:
                img_path = os.path.join(output_folder_1, img_path)
                frame = cv2.resize(frame, (224, 224))
                cv2.imwrite(img_path, frame)
            elif cv2.waitKey(0) == 50:
                img_path = os.path.join(output_folder_0, img_path)
                frame = cv2.resize(frame, (224, 224))
                cv2.imwrite(img_path, frame)

            grab, frame = video_stream.read()

def prepare_for_training(output_folder):
    pos_folder = os.path.join(output_folder, '1')
    neg_folder = os.path.join(output_folder, '0')
    assert os.path.exists(pos_folder) and os.path.exists(neg_folder)

    x = []
    y = []

    for img_path in os.listdir(pos_folder):
        img_path = os.path.join(pos_folder, img_path)
        x.append(cv2.imread(img_path))
        y.append(1)
    for img_path in os.listdir(neg_folder):
        img_path = os.path.join(neg_folder, img_path)
        x.append(cv2.imread(img_path))
        y.append(0)

    x = np.asarray(x)
    y = np.asarray(y)

    index = np.random.permutation(x.shape[0])
    x = x[index]
    y = y[index]
    return x, y

if __name__ == '__main__':
    input_folder = "/mnt/4T/pellet_dataset"
    output_folder = "/mnt/4T/pellet_output"
    generate_dataset(input_folder, output_folder)
    # prepare_for_training(output_folder)
