# Supplementary material for: The Home-Cage Automated Skilled Reaching Apparatus (HASRA): Individualized Training of Group-Housed Mice in a Single Pellet Reaching Task
Source: eNeuro. 2020 Oct 12;7(5):ENEURO.0242-20.2020. doi: 10.1523/ENEURO.0242-20.2020 (PMC7581188; doi:10.1523/ENEURO.0242-20.2020)
Supplement: Extended Data 1 — Archive of assembly instructions, Python/Arduino code, 3D printing STL files, and wiring diagrams. See “homecage assembly manual.pdf” and “README.md” contained in archive for more details. Download Extended Data 1, ZIP file. [file enu-eN-MNT-0242-20-s03.zip › Extended Data 1/src/client/genProfiles.py]

"""
    Author: Julian Pitney, Junzheng Wu
    Email: JulianPitney@gmail.com, jwu220@uottawa.ca
    Organization: University of Ottawa (Silasi Lab)
"""

import os

def gen_profile(mouseName):

    if(os.path.isdir(".."+os.sep+".."+os.sep+"AnimalProfiles"+os.sep + str(mouseName))):
        print(mouseName + " already has a profile! Skipping profile creation...")
        return 0
    else:
        print("Creating profile for " + str(mouseName) + "...")

    RFID = input("Enter animal RFID: ")
    cageNumber = input("Enter cage number: ")
    # profileDirectory = input("Enter profile save directory: ")
    profileDirectory = os.path.abspath(".."+os.sep+".."+os.sep+"AnimalProfiles"+os.sep+ str(mouseName))
    mouseName = mouseName
    mouseNumber = mouseName[len(mouseName) - 1]
    difficulty = "0"
    paw = "LEFT"
    sessionNumber = "2000"

    os.mkdir(".."+os.sep+".."+os.sep+"AnimalProfiles"+os.sep+ str(mouseName))
    os.mkdir(".."+os.sep+".."+os.sep+"AnimalProfiles"+os.sep+ str(mouseName) +os.sep+"Analyses")
    os.mkdir(".."+os.sep+".."+os.sep+"AnimalProfiles"+os.sep+ str(mouseName)+os.sep+"Logs")
    os.mkdir(".."+os.sep+".."+os.sep+"AnimalProfiles"+os.sep+str(mouseName) +os.sep+"Videos")
    os.mkdir(".."+os.sep+".."+os.sep+"AnimalProfiles"+os.sep+str(mouseName) +os.sep+"Temp")

    saveFile = open(".."+os.sep+".."+os.sep+"AnimalProfiles"+os.sep+ str(mouseName) + os.sep + str(mouseName) + "_save.txt", "w+")
    saveFile.write(str(RFID) + "\n")
    saveFile.write(str(mouseName) + "\n")
    saveFile.write(str(mouseNumber) + "\n")
    saveFile.write(str(cageNumber) + "\n")
    saveFile.write(str(difficulty) + "\n")
    saveFile.write(str(difficulty) + "\n")
    saveFile.write(str(paw) + "\n")
    saveFile.write(str(sessionNumber) + "\n")
    saveFile.write(str(profileDirectory) + "\n")
    logFile = open(".."+os.sep+".."+os.sep+"AnimalProfiles"+os.sep+ str(mouseName)+os.sep+"Logs"+os.sep+ str(mouseName) + "_session_history.csv", "w+")
    print("Profile created for " + str(mouseName) + "!")


for i in range(1,7):
    gen_profile("MOUSE" + str(i))
