# Supplementary material for: The Home-Cage Automated Skilled Reaching Apparatus (HASRA): Individualized Training of Group-Housed Mice in a Single Pellet Reaching Task
Source: eNeuro. 2020 Oct 12;7(5):ENEURO.0242-20.2020. doi: 10.1523/ENEURO.0242-20.2020 (PMC7581188; doi:10.1523/ENEURO.0242-20.2020)
Supplement: Extended Data 1 — Archive of assembly instructions, Python/Arduino code, 3D printing STL files, and wiring diagrams. See “homecage assembly manual.pdf” and “README.md” contained in archive for more details. Download Extended Data 1, ZIP file. [file enu-eN-MNT-0242-20-s03.zip › Extended Data 1/src/client/test_monitor.py]

import psutil
from time import sleep

def work_in_free_time(window_length=5, interval=3, threshold=0.3):
    cpu_pct = 0
    for i in range(window_length):
        cpu_pct += psutil.cpu_percent()
        sleep(interval)
    cpu_pct_ave = cpu_pct/float(window_length)
    print("cpu usage :%.4f" % cpu_pct_ave)
    if cpu_pct_ave < threshold:
        return True
    return False

if __name__ == '__main__':
    while(True):
        work_in_free_time(1, 2)
